# Supplementary material
Source: PubMed Central journal article supplement (PMC4071519)
Supplement: rstb20130345supp1.pdf [file rstb20130345supp1.pdf]

Renaut, S *et al.* 2014. Genomics of homoploid hybrid speciation: diversity and transcriptional activity of LTR retrotransposons in hybrid sunflowers. *Phil. Trans. R. Soc. B* **369** doi: 10.1098/rstb.2013.0345

### Supplementary figures

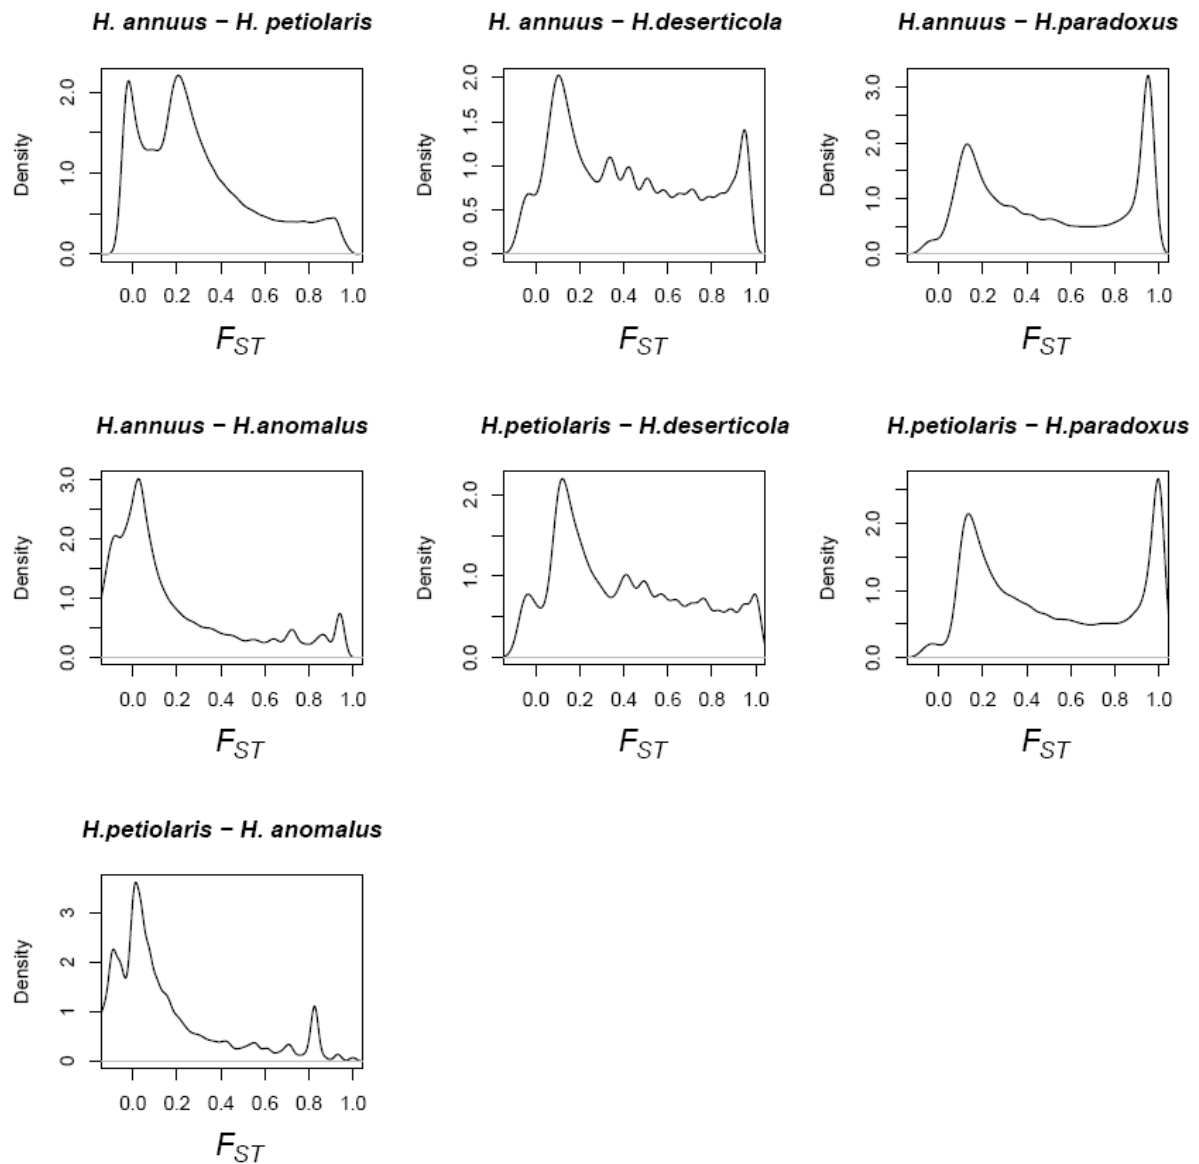

**Supplemental Figure 1.**  $F_{ST}$  distributions for the parental species pairs (*H. annuus* vs *H. petiolaris*) and their hybrids (*H. anomalus*, *H. deserticola*, *H. paradoxus*).

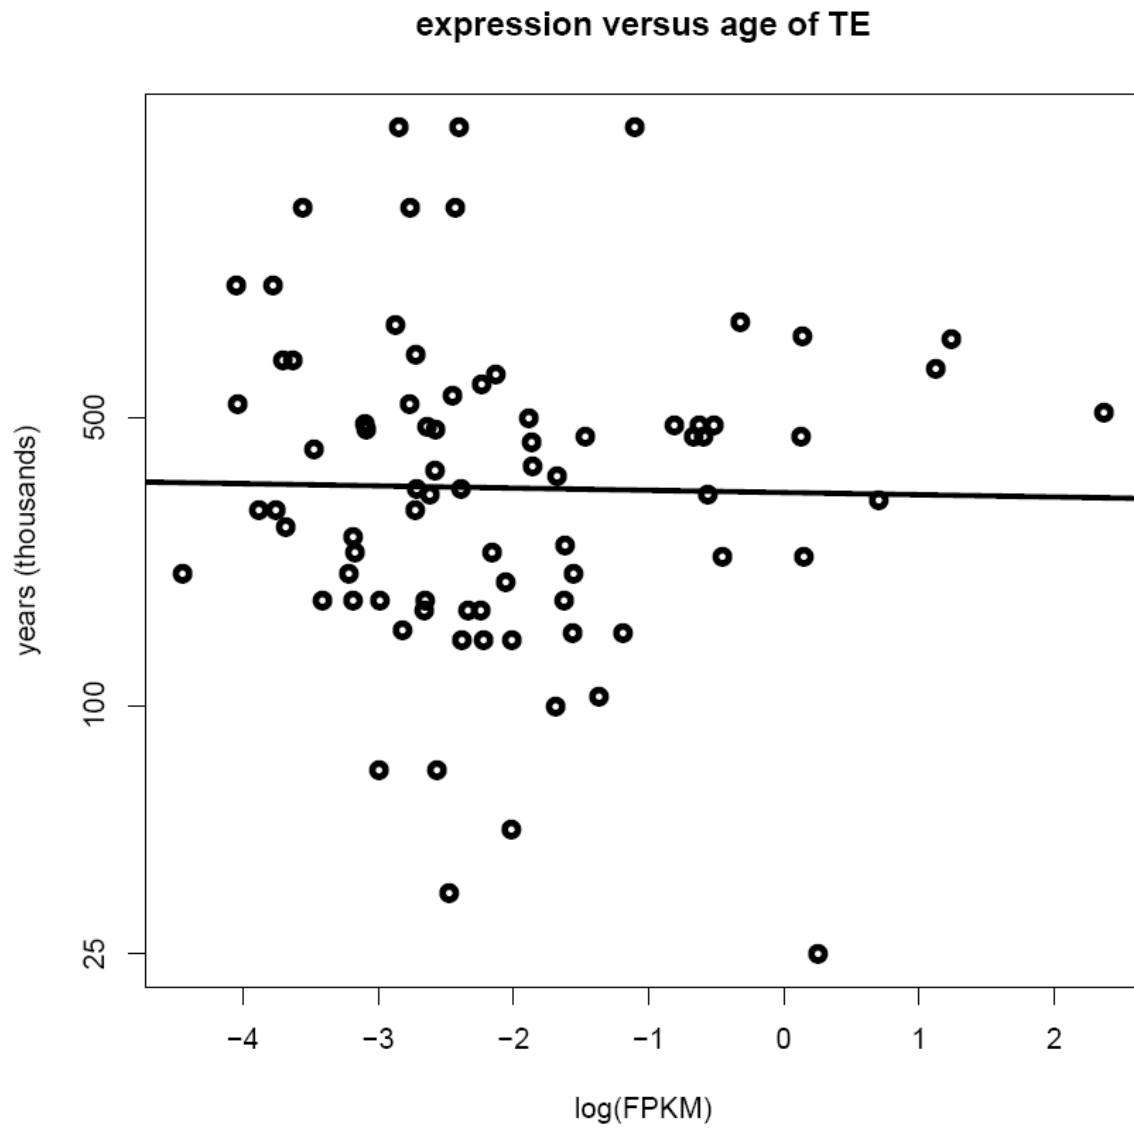

**Supplemental Figure 2.** Correlation between the age (from [76]) and expression of transposable elements for *H. annuus*. Similar non-significant relationships were observed for the other species.
